# Supplementary material for: Tuning Electronic Properties of GaSe/Silicane Van der Waals Heterostructure by External Electric Field and Strain: A First-Principle Study
Source: Hindawi journal article supplement (doi:10.1155/2021/5514897), 2021-03-10
Supplement: f1 [file 5514897.f1.docx]

**Support materials**


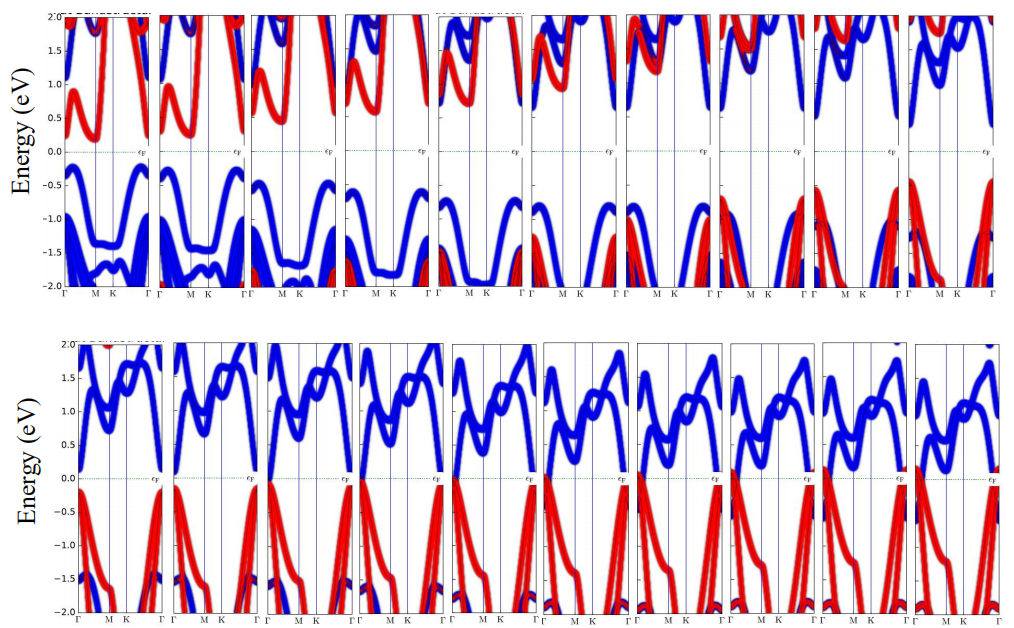


Fig. 1S. Band structures of the GaSe/SiH vdW heterostructure under applied electric fields with steps of 0.1 V/Å. The upper levels from left to right are −1 to −0.1 V/Å, while the lower levels from left to right are 0.1 to 1 V/Å. The blue lines represent the GaSe, while the red lines represent the SiH.


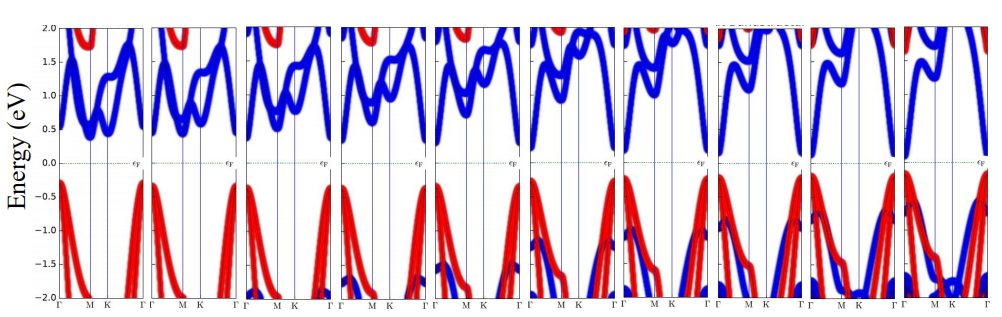


Fig. 2S. Band structures of the GaSe/SiH vdW heterostructure under in-plane biaxial strains with steps of 1%; from left to right, the strains are −5% to 5%. The blue lines represent the GaSe, while the red lines represent the SiH.

.
